# Supplementary material for: Prospective Registration and Outcome-Reporting Bias in Randomized Controlled Trials of Eczema Treatments: A Systematic Review
Source: PubMed Central journal article supplement — J Invest Dermatol. 2012 Jul 26;132(12):2727–34. doi: 10.1038/jid.2012.231 (PMC3511681; doi:10.1038/jid.2012.231), 2012-07-26
Supplement: jid2012231x1.pdf [file jid2012231x1.pdf]

## Unregistered Trials

Abramovits W, Oquendo M, Armstrong AW, *et al.* Hydrocortisone butyrate 0.1% lipocream in pediatric patients with atopic dermatitis. *SKINmed* 64 (3):72-9.

Arenberger P, Drozenova H, Hladicova M, *et al.* (2010) Additive effect of heparin and levomenol against atopic dermatitis. [German]. *Aktuelle Dermatologie* 36 (6):217-21.

Bieber T, Vick K, Fölster-Holst R, *et al.* (2007) Efficacy and safety of methylprednisolone aceponate ointment 0.1% compared to tacrolimus 0.03% in children and adolescents with an acute flare of severe atopic dermatitis. *Allergy* 62:184-9.

Bigliardi PL, Stammer H, Jost G, *et al.* (2007) Treatment of pruritus with topically applied opiate receptor antagonist. *J Am Acad Dermatol* 56:979-88.

Bissonnette R, Maari C, Provost N, *et al.* (2010) A double-blind study of tolerance and efficacy of a new urea-containing moisturizer in patients with atopic dermatitis. *J Cosmet Dermatol* 9(1):16-21.

Blessmann Weber M, De Tarso Da Luz Fontes Neto P, Prati C, *et al.* Improvement of pruritus and quality of life of children with atopic dermatitis and their families after joining support groups. *Journal of the European Academy of Dermatology and Venereology* 22(8):992-997.

Boguniewicz M, Zeichner JA, Eichenfield LF, *et al.* (2008) MAS063DP is effective monotherapy for mild to moderate atopic dermatitis in infants and children: a multicenter, randomized, vehicle-controlled study. *J pediatr* 152:854-9.

Breneman D, Fleischer AB, Abramovits W, *et al.* (2008) Intermittent therapy for flare prevention and long-term disease control in stabilized atopic dermatitis: a randomized comparison of 3-times-weekly applications of tacrolimus ointment versus vehicle. *J Am Acad Dermatol* 58:990-9.

Byun HJ, Lee HI, Kim B, *et al.* Full-spectrum light phototherapy for atopic dermatitis. *Int J Dermatol* 50 (1):94-101.

Caproni M, Torchia D, Antiga E, *et al.* (2007) The comparative effects of tacrolimus and hydrocortisone in adult atopic dermatitis: an immunohistochemical study. *Br J Dermatol* 156:312-9.

Cheng HM, Chiang LC, Jan YM, *et al.* (2011) The efficacy and safety of a Chinese herbal product (Xiao-Feng-San) for the treatment of refractory atopic dermatitis: a randomized, double-blind, placebo-controlled trial. *Int Arch Allergy Immunol* 155:141-8.

Cukrowska B, Ceregra A, Rosiak I, *et al.* The influence of probiotic *Lactobacillus casei* and *paracasei* strains on clinical status of atopic eczema in children with food allergy on cow's milk proteins. [Polish]. *Pediatrics Wspolczesna* 10(2): 67-70

De Belilovsky C, Roo-Rodriguez E, Baudouin C, *et al.* (2011) Natural peroxisome proliferator-activated receptor-alpha agonist cream demonstrates similar therapeutic response to topical steroids in atopic dermatitis. *Journal of Dermatological Treatment* 22 (6):359-65.

Del Rosso JQ, Bhambri S, Del Rosso JQ, *et al.* (2009) Daily application of fluocinonide 0.1% cream for the treatment of atopic dermatitis. *J Clin Aesthet Dermatol* 2:24-32.

Del Rosso JQ, Conte ET. An investigator-blinded evaluation of fluocinonide 0.1% cream in the treatment of atopic dermatitis and psoriasis vulgaris. *Cosmetic Dermatology* 20(9): 545-552.

Dolle S, Hoser D, Rasche C, Loddenkemper C, Maurer M, Zuberbier T, *et al.* (2010) Long-term reduction in local inflammation by a lipid raft molecule in atopic dermatitis. *Allergy: European Journal of Allergy and Clinical Immunology* 65 (9):1158-65.

Draelos ZD (2009) An evaluation of prescription device moisturizers. *J Cosmet Dermatol* 8:40-3.

Fowler J, Johnson A, Chen M, *et al* (2007) Improvement in pruritus in children with atopic dermatitis using pimecrolimus cream 1%. *Cutis; cutaneous medicine for the practitioner* 79:65-72.

Friedmann PS, Palmer R, Tan E, *et al.* (2007) A double-blind, placebo-controlled trial of montelukast in adult atopic eczema. *Clin Exp Allergy* 37:1536-40.

Gerasimov SV, Vasjuta VV, Myhovykh OO, *et al* (2010) Probiotic supplement reduces atopic dermatitis in preschool children: a randomized, double-blind, placebo-controlled, clinical trial. *American Journal of Clinical Dermatology* 11:351-61.

Ghanei N, Siassi F, Zandieh F, *et al* Effectiveness of prebiotic in atopic dermatitis reduction in 7-24 months old children living in Isfahan. [Arabic]. *Journal of Isfahan Medical School* 28 (113):679-87.

Glazenburg EJ, Wolkerstorfer A, Gerretsen AL, *et al.* (2009) Efficacy and safety of fluticasone propionate 0.005% ointment in the long-term maintenance treatment of children with atopic dermatitis: differences between boys and girls? *Pediatric Allergy & Immunology* 20:59-66.

Gollnick H, Kaufmann R, Stough D, *et al.* (2008) Pimecrolimus cream 1% in the long-term management of adult atopic dermatitis: prevention of flare progression. A randomized controlled trial. *British Journal of Dermatology* 158:1083-93.

Grimalt R, Mengeaud V, Cambazard F, *et al.* (2007) The steroid-sparing effect of an emollient therapy in infants with atopic dermatitis: a randomized controlled study. *Dermatology* 214:61-7.

Grüber C, Wendt M, Sulser C, *et al.* (2007) Randomized, placebo-controlled trial of *Lactobacillus rhamnosus* GG as treatment of atopic dermatitis in infancy. *Allergy* 62:1270-6.

Haeck IM, Knol MJ, Ten Berge O, *et al.* Enteric-coated mycophenolate sodium versus cyclosporin A as long-term treatment in adult patients with severe atopic dermatitis: a randomized controlled trial. *J Am Acad Dermatol* 64:1074-84.

Hamada M, Gyoutoku T, Sato S, *et al.* The usefulness of camellia oil spray for treatment of atopic dermatitis. [Japanese]. *Nishinippon Journal of Dermatology* 70(2): 213-218.

Hennino A, Cornu C, Rozieres A, *et al.* (2007) Influence of measles vaccination on the progression of atopic dermatitis in infants. *Pediatr Allergy Immunol* 18:385-90.

Hosokawa C, Takeuchi S, Furue M, *et al* (2009) Severity scores, itch scores and plasma substance P levels in atopic dermatitis treated with standard topical therapy with oral olopatadine hydrochloride. *J Dermatol* 36:185-90.

Hung SH, Lin YT, Chu CY, *et al.* (2007) Staphylococcus colonization in atopic dermatitis treated with fluticasone or tacrolimus with or without antibiotics *Ann Allergy Asthma Immunol* 98:51-6.

Januchowski R (2009) Evaluation of topical vitamin B12 for the treatment of childhood eczema. *J Altern Complement Med* 15:387-9.

Jee SJ, Kim JH, Baek HS, *et al.* Long-term efficacy of intravenous immunoglobulin therapy for moderate to severe childhood atopic dermatitis. *Allergy, Asthma and Immunology Research* 3 (2):89-95.

Kawana S, Kato Y, Omi T Efficacy of a 5-HT1a receptor agonist in atopic dermatitis. *Clin Exp Dermatol* 35 (8):835-40.

Kief H (2007) [A prospective, controlled study on the efficacy of the treatment with AHIT and treatment with Patient's blood in atopic dermatitis]. *Aktuelle Dermatologie* 33:216-27.

Klövekorn W, Tepe A, Danesch U (2007) A randomized, double-blind, vehicle-controlled, half-side comparison with a herbal ointment containing Mahonia aquifolium, Viola tricolor and Centella asiatica for the treatment of mild-to-moderate atopic dermatitis. *Int J Clin Pharmacol Ther* 45:583-91.

Kobayashi H, Ishii M, Takeuchi S, *et al.* ( 2010) Efficacy and safety of a traditional herbal medicine, hochu-ekki-to in the long-term management of Kikyo (Delicate Constitution) patients with atopic dermatitis: A 6-month, multicenter, double-blind, randomized, placebo-controlled study. *Evidence-based Complementary and Alternative Medicine* 7(3):367-73.

Koch C, Dölle S, Metzger M, *et al.* (2008) Docosahexaenoic acid (DHA) supplementation in atopic eczema: a randomized, double-blind, controlled trial. *Br J Dermatol* 158:786-92.

Koller DY, Halmerbauer G, Böck A, *et al.* (2007) Action of a silk fabric treated with AEGIS in children with atopic dermatitis: a 3-month trial. *Pediatr Allergy Immunol* 18:335-8.

Korting HC, Schollmann C, Cholcha W, *et al.* ( 2010) Efficacy and tolerability of pale sulfonated shale oil cream 4% in the treatment of mild to moderate atopic eczema in children: a multicentre, randomized vehicle-controlled trial. *Journal of the European Academy of Dermatology and Venereology* 24:1176-82.

Langley RG, Eichenfield LF, Lucky AW, *et al.* (2008) Sustained efficacy and safety of pimecrolimus cream 1% when used long-term (up to 26 weeks) to treat children with atopic dermatitis. *Pediatr Dermatol* 25:301-7.

Larsen FS, Simonsen L, Melgaard A, *et al.* (2007) An efficient new formulation of fusidic acid and betamethasone 17-valerate (fucicort lipid cream) for treatment of clinically infected atopic dermatitis. *Acta Derm Venereol* 87:62-8.

Lee J, Jung E, Koh J, *et al* (2008) Effect of rosmarinic acid on atopic dermatitis. *J Dermatol* 35:768-71.

Majoie IM, Oldhoff JM, van Weelden H, *et al.* (2009) Narrowband ultraviolet B and medium-dose ultraviolet A1 are equally effective in the treatment of moderate to severe atopic dermatitis. *J Am Acad Dermatol* 60:77-84.

Malekzad F, Arbabi M, Mohtasham N, *et al.* (2009) Efficacy of oral naltrexone on pruritus in atopic eczema: A double-blind, placebo-controlled study. *Journal of the European Academy of Dermatology and Venereology* 23:948-50.

Mandelin J, Remitz A, Virtanen H, *et al.* (2010) One-year treatment with 0.1% tacrolimus ointment versus a corticosteroid regimen in adults with moderate to severe atopic dermatitis: A randomized, double-blind, comparative trial. *Acta Derm Venereol* 90(2):170-4.

Matheson R, Kempers S, Breneman D, *et al.* (2008) Hydrocortisone butyrate 0.1% lotion in the treatment of atopic dermatitis in pediatric subjects. *Journal of drugs in dermatology* 7:266-71.

Meurer M, Eichenfield LF, Ho V, *et al.* (2010) Addition of pimecrolimus cream 1% to a topical corticosteroid treatment regimen in paediatric patients with severe atopic dermatitis: a randomized, double-blind trial. *J Dermatolog Treat* 21(3):157-66

Moroi M, Uchi S, Nakamura K, *et al.* Beneficial effect of a diet containing heat-killed *Lactobacillus paracasei* K71 on adult type atopic dermatitis. *J Dermatol* 38:131-9.

Msika P, De Belilovsky C, Piccardi N, *et al.* (2008) New Emollient with Topical Corticosteroid-Sparing Effect in Treatment of Childhood Atopic Dermatitis: SCORAD and Quality of Life Improvement. *Pediatr Dermatol* 25:606-12.

Neumann E, Amtage D, Bruckner-Tuderman L, *et al.* (2008) A single-center open-label long-term comparison of tacrolimus ointment and topical corticosteroids for treatment of atopic dermatitis. *Journal der Deutschen Dermatologischen Gesellschaft* 6:548-53.

Nivenius E, van der Ploeg I, Jung K, *et al.* (2007) Tacrolimus ointment vs steroid ointment for eyelid dermatitis in patients with atopic keratoconjunctivitis. A randomized, double-blind study to assess the efficacy of addition of tetracycline to triamcinolone acetonide in the treatment of moderate to severe atopic dermatitis. *Eye* 21:968-75.

Ozawa M, Numata I, Watabe A, *et al.* Effect of underwear made from MEDIELE on skin barrier function of atopic dermatitis patients in winter season. [Japanese]. *Skin Research* 7(4):475-481.

Pajno GB, Caminiti L, Vita D, *et al.* (2007) Sublingual immunotherapy in mite-sensitized children with atopic dermatitis: a randomized, double-blind, placebo-controlled study. *Journal of Allergy & Clinical Immunology* 120:164-70.

Patrizi A, Capitanio B, Neri I, *et al.* (2008) A double-blind, randomized, vehicle-controlled clinical study to evaluate the efficacy and safety of MAS063DP (ATOPICLAIR) in the management of atopic dermatitis in paediatric patients. *Pediatr Allergy Immunol* 19:619-25.

Pfab F, Athanasiadis GI, Huss-Marp J, *et al.* Effect of Acupuncture on Allergen-Induced Basophil Activation in Patients with Atopic Eczema: A Pilot Trial. *Journal of Alternative & Complementary Medicine* 17:309-14.

Rahman MF, Rashid MM, Sikder AU, *et al.* (2008) Efficacy of topical tacrolimus in atopic dermatitis. *Journal of Pakistan Association of Dermatologists* 18 (2):84-92.

Sagransky MJ, Yentzer BA, Williams LL, *et al.* A randomized controlled pilot study of the effects of an extra office visit on adherence and outcomes in atopic dermatitis. *Arch Dermatol* 146 (12):1428-30.

Schuttelaar ML, Coenraads PJ (2008) A randomized, double-blind study to assess the efficacy of addition of tetracycline to triamcinolone acetonide in the treatment of moderate to severe atopic dermatitis. *Journal of the European Academy of Dermatology & Venereology* 22, 1076-82.

Schuttelaar ML, Vermeulen KM, Drukker N, *et al.* (2010) A randomized controlled trial in children with eczema: nurse practitioner vs. dermatologist. *Br J Dermatol* 162(1):162-70.

Senapati S, Banerjee S, Gangopadhyay DN (2008) Evening primrose oil is effective in atopic dermatitis: a randomized placebo-controlled trial. *Indian Journal of Dermatology, Venereology & Leprology* 74:447-52.

Shaw M, Morrell DS, Goldsmith LA (2008) A study of targeted enhanced patient care for pediatric atopic dermatitis (STEP PAD). *Pediatr Dermatol* 25:19-24.

Shi YJ, Zhang CM, Ma DM (2008) [Clinical study on treatment of atopic dermatitis by integrated traditional Chinese and Western medicine]. [Chinese]. *Zhongguo Zhong Xi Yi Jie He Za Zhi Zhongguo Zhongxiyi Jiehe Zazhi/Chinese Journal of Integrated Traditional & Western Medicine/Zhongguo Zhong Xi Yi Jie He Xue Hui, Zhongguo Zhong Yi Yan Jiu Yuan Zhu Ban* 28:686-8.

Shibata R, Kimura M, Takahashi H, *et al.* (2009) Clinical effects of kestose, a prebiotic oligosaccharide, on the treatment of atopic dermatitis in infants. *Clin Exp Allergy* 39:1397-403.

Sidbury R, Sullivan AF, Thadhani RI, *et al.* (2008) Randomized controlled trial of vitamin D supplementation for winter-related atopic dermatitis in Boston: a pilot study. *Br J Dermatol* 159:245-7.

Sigurgeirsson B, Ho V, Ferrandiz C, *et al.* (2008) Effectiveness and safety of a prevention-of-flare-progression strategy with pimecrolimus cream 1% in the management of paediatric atopic dermatitis. *Journal of the European Academy of Dermatology & Venereology* 22:1290-301.

Stinco G, Piccirillo F, Valent F (2008) A randomized double-blind study to investigate the clinical efficacy of adding a non-migrating antimicrobial to a special silk fabric in the treatment of atopic dermatitis. *Dermatology* 217:191-5.

Tan WP, Suresh S, Tey HL, *et al.* (2010) A randomized double-blind controlled trial to compare a triclosan-containing emollient with vehicle for the treatment of atopic dermatitis. *Clin Exp Dermatol* 35:e109-12.

Tripodi S, Di Rienzo Businco A, *et al.* (2009) Lack of efficacy of topical furfuryl palmitate in pediatric atopic dermatitis: A randomized double-blind study. *J Investig Allergol Clin Immunol* 19:204-9.

Vita D, Passalacqua G, Di Pasquale G, *et al.* (2007) Ass's milk in children with atopic dermatitis and cow's milk allergy: crossover comparison with goat's milk. *Pediatr Allergy Immunol* 18:594-8.

Wong AW, Hon EK, Zee B (2008) Is topical antimycotic treatment useful as adjuvant therapy for flexural atopic dermatitis: randomized, double-blind, controlled trial using one side of the elbow or knee as a control. *Int J Dermatol* 47:187-91.

Yang XY, Xu LM, Zhou AM, *et al.* (2010) The adjuvant treatment of atopic dermatitis with medical skin preparation containing extracts from *Portulaca oleracea* and avocado. [Chinese]. *Journal of Clinical Dermatology* 39 (7):460-2.

Yokoyama Y, Kimata H, Mitarai S, *et al.* (2009) Ethylene vinyl alcohol (EVOH) fiber compared to cotton underwear in the treatment of childhood atopic dermatitis: A double-blind randomized study. *Indian Pediatr* 46:611-4.

Yoshida Y, Seki T, Matsunaka H, *et al.* (2010) Clinical effects of probiotic bifidobacterium breve supplementation in adult patients with atopic dermatitis. *Yonago Acta Medica* 53 (2):37-45.

## Registered Trials

Armstrong AW, Kim RH, Idriss NZ, *et al.* Online video improves clinical outcomes in adults with atopic dermatitis: A randomized controlled trial. *J Am Acad Dermatol* 64 (3):502-7.

Aschoff R, Schwanebeck U, Brautigam M, *et al.* (2009) Skin physiological parameters confirm the therapeutic efficacy of pimecrolimus cream 1% in patients with mild-to-moderate atopic dermatitis. *Exp Dermatol* 18:24-9.

Bangert C, Strober BE, Cork M, *et al.* Clinical and cytological effects of pimecrolimus cream 1% after resolution of active atopic dermatitis lesions by topical corticosteroids: A randomized controlled trial. *Dermatology* 222 (1):36-48.

Bissonnette R, Chen G, Bolduc C, *et al.* (2010) Efficacy and safety of topical WBI-1001 in the treatment of atopic dermatitis: results from a phase 2A, randomized, placebo-controlled clinical trial. *Arch Dermatol* 146:446-9.

Brenninkmeijer EEA, Spuls PI, Lindeboom R, *et al.* Excimer laser vs. clobetasol propionate 0.05% ointment in prurigo form of atopic dermatitis: a randomized controlled trial, a pilot. *Br J Dermatol* 163:823-31.

Doss N, Kamoun MR, Dubertret L, *et al.* (2010) Efficacy of tacrolimus 0.03% ointment as second-line treatment for children with moderate-to-severe atopic dermatitis: evidence from a randomized, double-blind non-inferiority trial vs. fluticasone 0.005% ointment. *Pediatr Allergy Immunol* 2pt1: 321-9.

Doss N, Reitamo S, Dubertret L, *et al.* (2009) Superiority of tacrolimus 0.1% ointment compared with fluticasone 0.005% in adults with moderate to severe atopic dermatitis of the face: results from a randomized, double-blind trial. *Br J Dermatol* 161:427-34.

Foelster Holst R, Reitamo S, Yankova R, *et al.* The novel protease inhibitor SRD441 ointment is not effective in the treatment of adult subjects with atopic dermatitis: results of a randomized, vehicle-controlled study.[Erratum appears in *Allergy*. 2011 Feb;66(2):306 Note: Thaci, K [corrected to Thaci, D]. *Allergy* 65:1594-9.

Frankel A, Sohn A, Patel RV, *et al.* (2011) Bilateral comparison study of pimecrolimus cream 1% and a ceramide-hyaluronic acid emollient foam in the treatment of patients with atopic dermatitis. *J Drugs Dermatol* 10:666-72.

- Gambichler T, Othlinghaus N, Tomi NS, *et al.* (2009) Medium-dose ultraviolet (UV) A1 vs. narrowband UVB phototherapy in atopic eczema: A randomized crossover study. *Br J Dermatol* 160:652-8.
- Ghanei N, Siassi F, Zandieh F, *et al.* Effectiveness of prebiotic in atopic dermatitis reduction in 7-24 months old children living in Isfahan. [Arabic]. *Journal of Isfahan Medical School* 28 (113):679-87.
- Gobel R, Larsen N, Molgaard C, *et al.* (2010) Probiotics to young children with atopic dermatitis: A randomized placebo-controlled trial. *International Journal of Probiotics and Prebiotics* 5 (2):53-9.
- Gradman J, Wolthers OD (2007) Short-term growth in children with eczema during treatment with topical mometasone furoate and tacrolimus. *Acta Paediatr* 96:1233-7.
- Gueniche A, Knaudt B, Schuck E, *et al.* (2008) Effects of nonpathogenic gram-negative bacterium *Vitreoscilla filiformis* lysate on atopic dermatitis: a prospective, randomized, double-blind, placebo-controlled clinical study. *Br J Dermatol* 159:1357-63.
- Heil PM, Maurer D, Klein B, *et al.* Omalizumab therapy in atopic dermatitis: depletion of IgE does not improve the clinical course - a randomized, placebo-controlled and double blind pilot study. *Journal der Deutschen Dermatologischen Gesellschaft* 8:990-8.
- Hoeger PH, Lee KH, Jautova J, *et al.* (2009) The treatment of facial atopic dermatitis in children who are intolerant of, or dependent on, topical corticosteroids: A randomized, controlled clinical trial. *Br J Dermatol* 160:415-22.
- Hon KL, Leung TF, Ng PC, *et al.* (2007) Efficacy and tolerability of a Chinese herbal medicine concoction for treatment of atopic dermatitis: a randomized, double-blind, placebo-controlled study. *Br J Dermatol* 157:357-63.
- Huang JT, Abrams M, Tloutan B, *et al.* (2009) Treatment of *Staphylococcus aureus* colonization in atopic dermatitis decreases disease severity. *Pediatrics* 123:e808-e14.
- Jensen JM, Pfeiffer S, Witt M, Bräutigam M, *et al.* (2009) Different effects of pimecrolimus and betamethasone on the skin barrier in patients with atopic dermatitis.[Erratum appears in *J Allergy Clin Immunol*. 2009 Nov;124(5):1038]. [Reprint in *J Allergy Clin Immunol*. 2009 Sep;124(3 Suppl 2):R19-28; PMID: 19720208]. *J Allergy Clin Immunol* 123:1124-33.
- Miller DW, Koch SB, Yentzer BA, *et al.* (2011) An over-the-counter moisturizer is as clinically effective as, and more cost-effective than, prescription barrier creams in the treatment of children with mild-to-moderate atopic dermatitis: a randomized, controlled trial. *J Drugs Dermatol* 10:531-7.
- Moore EJ, Williams A, Manias E, *et al.* (2009) Eczema workshops reduce severity of childhood atopic eczema. *Australas J Dermatol* 50:100-6.
- Murrell DF, Calvieri S, Ortonne JP, *et al.* (2007) A randomized controlled trial of pimecrolimus cream 1% in adolescents and adults with head and neck atopic dermatitis and intolerant of, or dependent on, topical corticosteroids. *Br J Dermatol* 157:954-9.
- Nermes M, Kantele JM, Atosuo TJ, *et al.* Interaction of orally administered *Lactobacillus rhamnosus* GG with skin and gut microbiota and humoral immunity in infants with atopic dermatitis. *Clin Exp Allergy* 41 (3):370-7.

Peserico A, Städtler G, Sebastian M, *et al.* (2008) Reduction of relapses of atopic dermatitis with methylprednisolone aceponate cream twice weekly in addition to maintenance treatment with emollient: a multicentre, randomized, double-blind, controlled study. *Br J Dermatol* 158:801-7.

Reitamo S, Mandelin J, Rubins A, *et al.* (2009) The pharmacokinetics of tacrolimus after first and repeated dosing with 0.03% ointment in infants with atopic dermatitis. *Int J Dermatol* 48:348-55.

Ruer-Mulard M, Aberer W, Gunstone A, *et al.* (2009) Twice-daily versus Once-daily applications of pimecrolimus cream 1% for the prevention of disease relapse in pediatric patients with atopic dermatitis. *Pediatr Dermatol* 26:551-8.

Schmitt J, Schäkel K, Fölster-Holst R, *et al.* (2010) Prednisolone vs. ciclosporin for severe adult eczema. An investigator-initiated double-blind placebo-controlled multicentre trial. *Br J Dermatol* 162:661-8.

Shaflei A, Moin M, Pourpak Z, *et al.* Synbiotics could not reduce the Scoring of Childhood Atopic Dermatitis (SCORAD): A randomized double blind placebo-controlled trial. *Iranian Journal of Allergy, Asthma and Immunology* 10 (1):21-8.

Sugarman JL, Parish LC, Sugarman JL, *et al.* (2009) Efficacy of a lipid-based barrier repair formulation in moderate-to-severe pediatric atopic dermatitis. *J Drugs Dermatol* 8:1106-11.

Thaci D, Reitamo S, Gonzalez Ensenat MA, *et al.* (2008) Proactive disease management with 0.03% tacrolimus ointment for children with atopic dermatitis: results of a randomized, multicentre, comparative study. *Br J Dermatol* 159:1348-56.

Thomas KS, Dean T, O'Leary C, *et al.* A randomised controlled trial of ion-exchange water softeners for the treatment of eczema in children. *PLoS Medicine* 8 (2).

Tzaneva S, Kittler H, Holzer G, *et al.* 5-Methoxypsoralen plus ultraviolet (UV) A is superior to medium-dose UVA1 in the treatment of severe atopic dermatitis: a randomized crossover trial. *Br J Dermatol* 162(3):655-60.

van der Aa LB, Heymans HS, van Aalderen WM, *et al.* Effect of a new synbiotic mixture on atopic dermatitis in infants: a randomized-controlled trial. *Clin Exp Allergy* 40(5):795-804.

Wiren K, Nohlgard C, Nyberg F, *et al.* (2009) Treatment with a barrier-strengthening moisturizing cream delays relapse of atopic dermatitis: A prospective and randomized controlled clinical trial. *Journal of the European Academy of Dermatology and Venereology* 23:1267-72.

Wollenberg A, Reitamo S, Atzori F, *et al.* (2008) Proactive treatment of atopic dermatitis in adults with 0.1% tacrolimus ointment. [republished in *Allergy* 63(7):742-50; PMID: 18592619]. *Allergy* 63:742-50.

Woo SI, Kim JY, Lee YJ, *et al.* (2010) Effect of *Lactobacillus sakei* supplementation in children with atopic eczema-dermatitis syndrome. *Ann Allergy Asthma Immunol* 4:343-8.

Zuberbier T, Heinzerling L, Bieber T, *et al.* (2007) Steroid-sparing effect of pimecrolimus cream 1% in children with severe atopic dermatitis. *Dermatology (Basel, Switzerland)* 215:325-30.



**Footnote** - Only the following journals cited above in these trials currently make it an explicit requirement that a trial be registered or that the CONSORT guidelines, which include trial registration must have been adhered to be accepted for publication: PLoS Medicine, Pediatrics, Journal of the European Academy of Dermatology and Venereology, Journal of the American Academy of Dermatology, Journal of Dermatological Treatment, The Journal of Clinical and Aesthetic Dermatology, International Journal of Clinical Pharmacology and Therapeutics, Eye, Clinical and Experimental Allergy, British Journal of Dermatology, Archives of Dermatology, Annals of Allergy, Asthma and Immunology, American Journal of Clinical Dermatology.
